# Supplementary material for: Breast cancer bone metastases are attenuated in a Tgif1-deficient bone microenvironment
Source: Springer Nature journal article supplement (doi:10.1186/s13058-020-01269-8), 2020-04-09
Supplement: MOESM3 [file 17883342]

## Supplemental Figure 3

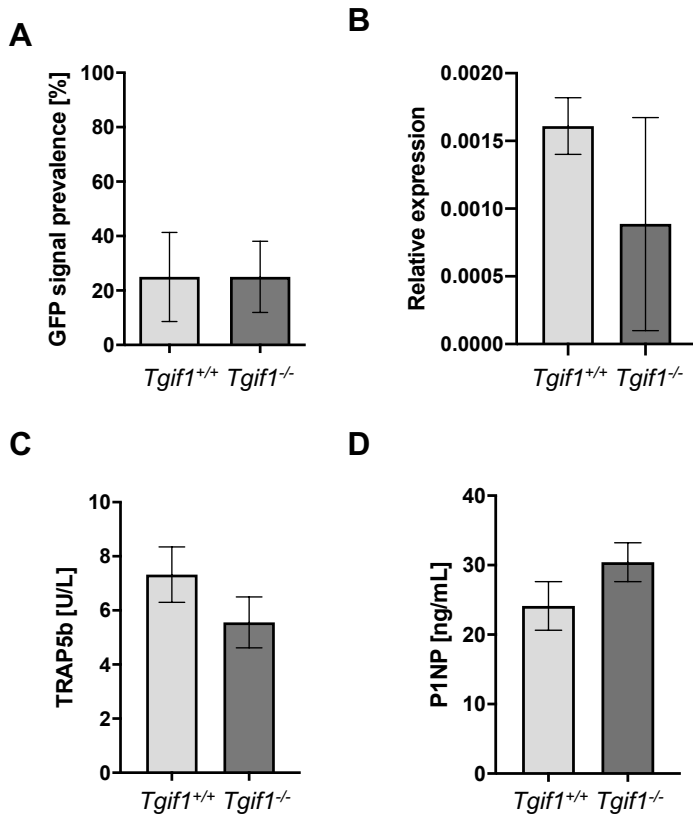

**Supplemental Figure 3. Analysis of tumor cell distribution and bone turnover markers in cancer-bearing mice.** **A**, Presence of breast cancer cells in the lungs of *Tgif1*<sup>+/+</sup> and *Tgif1*<sup>-/-</sup> mice 5 days after intracardiac injection of 4T1-GFP cells. **B**, GFP mRNA expression in the lungs of *Tgif1*<sup>+/+</sup> and *Tgif1*<sup>-/-</sup> mice (n=2-3/group). GFP expression was normalized to the expression of the house keeping gene B2M. **C** and **D**, Serum concentration of TRAP5b and P1NP in *Tgif1*<sup>+/+</sup> and *Tgif1*<sup>-/-</sup> (n=6-8 mice/group). Data are presented as mean±SEM. Two-tailed Student's t-test was used to compare two groups.
