# Supplementary material for: Breast cancer bone metastases are attenuated in a Tgif1-deficient bone microenvironment
Source: Springer Nature journal article supplement (doi:10.1186/s13058-020-01269-8), 2020-04-09
Supplement: MOESM4 [file 17883342]

# Supplemental Figure 4

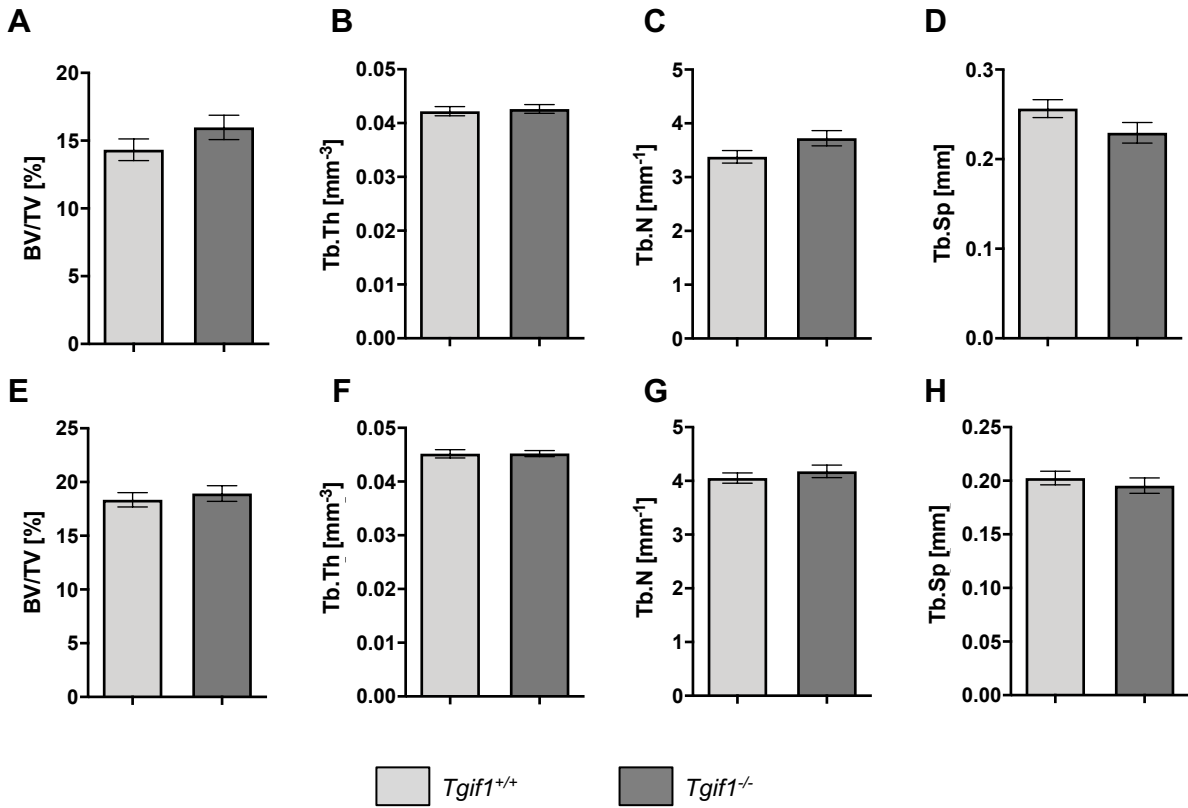

**Supplemental Figure 4. Analysis of the bone phenotype of *Tgif1*<sup>+/+</sup> and *Tgif1*<sup>-/-</sup> mice.** A-D, Micro-computed tomography ( $\mu$ CT) analysis of the trabecular bone mass (BV/TV, bone volume/tissue volume) (A), trabecular number (Tb.N) (B), trabecular thickness (Tb.Th) (C) and trabecular separation (Tb.Sp) (D) of right tibiae. E - H,  $\mu$ CT analysis of tibiae from mice five days after tumor cell injection (n $\geq$ 8). For abbreviations, see A-D. Data are presented as mean $\pm$ SEM. Two-tailed Student's t-test was used to compare two groups.
